# Supplementary material for: Soluble Nogo receptor 1 fusion protein protects neural progenitor cells in rats with ischemic stroke
Source: PubMed Central journal article supplement — Neural Regen Res. 2019 Oct;14(10):1755–64. doi: 10.4103/1673-5374.257531 (PMC6585563; doi:10.4103/1673-5374.257531), 2019-10
Supplement: NRR-14-1755_Suppl2.pdf [file NRR-14-1755_Suppl2.pdf]

## OPEN PEER REVIEW REPORT 2

**Reviewer 2:** Sergei Fedorovich, Institute of Biophysics and Cell Engineering NASB, Laboratory of Biophysics and Engineering of Cell, Belarus.

**Comments to authors:**

This study addresses the role of Nogo66 receptors in central nervous system repairing. Previously it was shown that this protein is involved in neuronal axons regeneration. Authors clearly show that Nogo66 receptor also able to regulate proliferation of neural progenitor cells. This effect can be important for recovering after stroke.

Minor points

- 1) Authors wrote "stroke is the leading cause of mobility and mortality" (P. 3, line 2). Probably authors mean 'immobility'?
- 2) Figure 2 'sacrafice'.
